# Supplementary material
Source: publisher figshare collection journal article supplement (https://sage.figshare.com/ndownloader/files/24789558)
Supplement: Supplementary file 1 [file 24789558]

Appendix A

*Importance for Survival Scale (IFSS) representing six facets of IFS*

_________________________________________________________________________________

(i) Water (presence and clarity)

1 = no water; 1.5 = hint/promise of water e.g. dry creek bed; 2 = mud; 2.5 = muddy or opaque water;

3 = cloudy water; 3.5 = semi-clear water; 4 = average clarity; 4.5 = close to clear; 5 = crystal clear

(ii) Plant matter (presence/evidence, volume, and verdancy)

(a) Presence/evidence of plant matter (including tree trunks and foliage,dead or alive)

1 = no plant matter; 2 = less than 25% of frame; 3 = 25-50% of frame; 4 = 50-75% of frame;

5 = 75-100% of frame.

(b) Verdancy of plant matter (by volume and/or lushness)

1 = No green/lush plant matter; 2 = less than 25% green/lush; 3 = 25-50% green/lush,

4 = 50-75% green/lush; 5 = 75-100% green/lush.

(iii) Weather

(a) Threat/tension/movement vs. tranquility (evidenced in sky, water, movement of foliage etc.)

1 = imminent threat; 2 = moderate threat; 3 = little threat; 4 = calm; 5 = very calm

(b) Sky/brightness (evidenced in sky, or by presence of shade or reflections)

1 = completely overcast; 2 = less than 25% blue/bright; 3 = 25-50% blue/bright;

4 = 50-75% blue/bright; 5 = 75-100% blue/bright.

(iv) Protection

(a) Shelter from sun

1 = no shelter; 2 = little shelter; 3 = moderate shelter; 4 = moderate-high shelter;

5 = near complete shelter.

(b) Shelter from rain/snow/hail etc.

1 = no shelter; 2 = little shelter; 3 = moderate shelter; 4 = moderate-high shelter;

5 = near complete shelter

(c) Shelter from wind

1 = no shelter; 2 = little shelter; 3 = moderate shelter; 4 = moderate-high shelter;

5 = near complete shelter

(v) Openness

(a) Depth of field (approximate)

1= less than 10 metres; 2 = 10metres to mid distance; 3 = mid distance; 4 = mid to far distance;

5 = to horizon

(b) How much is a clear view through the scene hidden?

1= 80-100%; 2 = 60-80%; 3 = 40-60%; 4 = 20-40%; 5 = less than 20%

(vi) Access(Degree to which an average person could safely and comfortably participate in/ move through the scene)

What % of this scene could a person move through: (in increments of 10%)

(a) With high discomfort/difficulty/danger? .......% x 1 =.........

(b) With moderate-high discomfort/difficulty/danger? .......% x 2 =.........

(c) With medium discomfort/difficulty/danger? .......% x 3 =.........

(d) With a little discomfort/difficulty/danger? .......% x 4 =..........

(e) Easily, comfortably and safely? .......% x 5 =..........

________________________________________________________________________________*Note.* A mean subscale score is calculated for facets 2-5. A subscale score for facet 6 is calculated by summing totals for (a) to (d) and dividing by 100. Mean IFS score = mean of the six IFS facet scores
